# Supplementary material for: Tempo and mode of morphological evolution are decoupled from latitude in birds
Source: PLoS Biol. 2021 Aug 24;19(8):e3001270. doi: 10.1371/journal.pbio.3001270 (PMC8384433; doi:10.1371/journal.pbio.3001270)
Supplement: S10 Data — BM, Brownian motion; MLE, maximum likelihood estimate. (XLSX) [file pbio.3001270.s043.xlsx]

## Sheet: data
family.id	proptrop.breeding	trait	mean.se.sq	mean.BM1.error	total.error
Acanthizidae.0	0.375	ln.mass	0.000872833	0.0134869	0.0143597
Accipitridae.1	0.230769	ln.mass	0.00253185	1.22e-07	0.00253197
Accipitridae.2	0.321429	ln.mass	0.0040981	0.0175306	0.0216287
Accipitridae.3	0.285714	ln.mass	0.00305923	0.0211387	0.024198
Aegithalidae.0	0.1	ln.mass	0.00288854	0.0164981	0.0193867
Alaudidae.0	0.307692	ln.mass	0.00229956	0.00485386	0.00715342
Alcedinidae.0	0.623656	ln.mass	0.00265779	6.64e-07	0.00265846
Anatidae.0	0.0649351	ln.mass	0.00148672	0.014591	0.0160778
Apodidae.0	0.627451	ln.mass	0.00227897	1.63e-08	0.00227898
Ardeidae.0	0.112903	ln.mass	0.00281591	2.64e-09	0.00281591
Artamidae.0	0.363636	ln.mass	0.000906957	1.11e-08	0.000906968
Bucconidae.0	0.828571	ln.mass	0.00263387	3.65e-08	0.00263391
Bucerotidae.0	0.763636	ln.mass	0.00249902	3.75e-08	0.00249906
Campephagidae.0	0.678571	ln.mass	0.00308261	0.0145201	0.0176027
Caprimulgidae.0	0.511111	ln.mass	0.00278369	0.0548968	0.0576805
Cardinalidae.0	0.5	ln.mass	0.00161502	1.53e-10	0.00161502
Certhiidae.0	0	ln.mass	0.00215427	0.00182026	0.00397453
Charadriidae.0	0.109375	ln.mass	0.00149617	0.0131449	0.0146411
Chloropseidae.0	0.636364	ln.mass	0.00418729	0.0353217	0.0395089
Ciconiidae.0	0.157895	ln.mass	0.00297502	0.0156784	0.0186534
Cisticolidae.0	0.587719	ln.mass	0.00238694	0.0145151	0.0169021
Colluricinclidae.0	0.785714	ln.mass	0.00209538	0.113855	0.115951
Columbidae.1	0.767123	ln.mass	0.00339802	1.69e-09	0.00339802
Columbidae.2	0.521739	ln.mass	0.00290136	0.0380617	0.040963
Columbidae.3	0.294118	ln.mass	0.00205865	0.0962774	0.098336
Coraciidae.0	0.416667	ln.mass	0.00206943	0.0384109	0.0404804
Corvidae.0	0.418803	ln.mass	0.00249269	0.0198225	0.0223152
Cotingidae.0	0.75	ln.mass	0.00219917	1.38e-08	0.00219919
Cracidae.0	0.76	ln.mass	0.00356163	0.0121122	0.0156739
Cracticidae.0	0.545455	ln.mass	0.000870532	1e-09	0.000870533
Cuculidae.0	0.475177	ln.mass	0.00211869	0.0272032	0.0293218
Dendrocolaptidae.0	0.692308	ln.mass	0.00137715	2.51e-10	0.00137715
Dicaeidae.0	0.8	ln.mass	0.00327599	0.010104	0.0133799
Dicruridae.0	0.478261	ln.mass	0.00211619	0.0419873	0.0441035
Emberizidae.1	0.370861	ln.mass	0.00144296	0.00560122	0.00704418
Emberizidae.2	0.47482	ln.mass	0.00216525	2.86e-08	0.00216528
Estrildidae.0	0.698529	ln.mass	0.00181716	1.11e-10	0.00181716
Eurylaimidae.0	0.8	ln.mass	0.00288564	0.177505	0.180391
Falconidae.0	0.296875	ln.mass	0.00212616	0.00572034	0.00784649
Formicariidae.0	0.888889	ln.mass	0.00370334	0.0133701	0.0170734
Fringillidae.0	0.369697	ln.mass	0.00246036	0.0139243	0.0163846
Furnariidae.2	0.755102	ln.mass	0.00193944	4.63e-12	0.00193944
Furnariidae.3	0.272727	ln.mass	0.00367756	0.1146	0.118277
Galbulidae.0	0.888889	ln.mass	0.00300033	7.62e-11	0.00300034
Glareolidae.0	0.333333	ln.mass	0.00252957	0.133972	0.136501
Gruidae.0	0.0666667	ln.mass	0.00128411	0.103365	0.104649
Haematopodidae.0	0	ln.mass	0.000454109	0.0184783	0.0189324
Hirundinidae.0	0.365854	ln.mass	0.00206467	0.00438428	0.00644895
Icteridae.0	0.515152	ln.mass	0.00186012	1.3e-08	0.00186014
Indicatoridae.0	0.625	ln.mass	0.000575445	2.8e-10	0.000575445
Laniidae.0	0.4	ln.mass	0.00129629	0.0293314	0.0306277
Malaconotidae.0	0.660377	ln.mass	0.00160947	0.000443669	0.00205314
Maluridae.0	0.407407	ln.mass	0.000687749	0.0121539	0.0128417
Megapodiidae.0	0.904762	ln.mass	0.00294098	0.321298	0.324239
Melanocharitidae.0	1	ln.mass	0.00163119	2.93e-09	0.00163119
Meliphagidae.0	0.664773	ln.mass	0.00188933	0.000571201	0.00246053
Meropidae.0	0.538462	ln.mass	0.00184694	0.0644072	0.0662541
Mimidae.0	0.428571	ln.mass	0.000764642	0.0568121	0.0575768
Momotidae.0	0.666667	ln.mass	0.00174026	0.0771617	0.078902
Monarchidae.0	0.84375	ln.mass	0.00294884	0.0265126	0.0294614
Motacillidae.0	0.213115	ln.mass	0.00157308	0.0154746	0.0170477
Muscicapidae.1	0.266667	ln.mass	0.00305511	0.00799437	0.0110495
Muscicapidae.2	0.540984	ln.mass	0.00160484	0.0111529	0.0127577
Muscicapidae.3	0.605263	ln.mass	0.00410033	0.0959327	0.100033
Muscicapidae.4	0.8125	ln.mass	0.0017038	1.16e-08	0.00170381
Musophagidae.0	0.826087	ln.mass	0.0021832	1.83e-09	0.0021832
Nectariniidae.0	0.733871	ln.mass	0.0018684	5.25e-09	0.00186841
Odontophoridae.0	0.677419	ln.mass	0.00378981	0.00228768	0.00607749
Oriolidae.0	0.7	ln.mass	0.00346106	0.027353	0.0308141
Otididae.0	0.24	ln.mass	0.00426557	1.06e-06	0.00426664
Pachycephalidae.0	0.864865	ln.mass	0.00231265	0.039112	0.0414247
Paradisaeidae.0	0.975	ln.mass	0.00109315	4.63e-08	0.00109319
Paridae.0	0.215686	ln.mass	0.00239329	0.0030025	0.00539579
Parulidae.0	0.368421	ln.mass	0.0012622	0.0052144	0.0064766
Passeridae.0	0.469388	ln.mass	0.00224674	0.0415976	0.0438443
Petroicidae.0	0.636364	ln.mass	0.00171564	3.66e-08	0.00171568
Phalacrocoracidae.0	0.030303	ln.mass	0.00124744	0.246536	0.247783
Phasianidae.0	0.376404	ln.mass	0.00375184	6.96e-09	0.00375185
Picidae.1	0.452632	ln.mass	0.0025762	0.00145807	0.00403426
Picidae.2	0.814815	ln.mass	0.00335762	0.0199003	0.0232579
Pipridae.0	0.851852	ln.mass	0.00130286	0.00298626	0.00428913
Pittidae.0	0.65625	ln.mass	0.00410134	0.105834	0.109935
Platysteiridae.0	0.741935	ln.mass	0.00100694	1.15e-10	0.00100694
Ploceidae.0	0.707547	ln.mass	0.00191072	0.0284946	0.0304053
Podargidae.0	0.8	ln.mass	0.00412414	5.1e-08	0.00412419
Podicipedidae.0	0.105263	ln.mass	0.0012489	2.01e-09	0.0012489
Polioptilidae.0	0.533333	ln.mass	0.000972065	6.46e-10	0.000972066
Prunellidae.0	0.0833333	ln.mass	0.00195046	0.0472498	0.0492002
Psittacidae.1	0.673077	ln.mass	0.00302405	0.0471256	0.0501496
Psittacidae.2	0.677019	ln.mass	0.00284355	3.56e-09	0.00284355
Psittacidae.3	0.35	ln.mass	0.00106086	0.0878343	0.0888951
Pteroclididae.0	0.125	ln.mass	0.00393557	1.87e-08	0.00393559
Ptilonorhynchidae.0	0.684211	ln.mass	0.000809994	0.0577354	0.0585454
Pycnonotidae.0	0.704	ln.mass	0.00188181	0.0177893	0.0196711
Rallidae.0	0.383459	ln.mass	0.00313579	0.00123142	0.00436721
Ramphastidae.0	0.795082	ln.mass	0.00144587	4.82e-10	0.00144587
Remizidae.0	0.384615	ln.mass	0.00167983	0.00158088	0.00326071
Rhinocryptidae.0	0.666667	ln.mass	0.00300866	2.59e-08	0.00300868
Rhipiduridae.0	0.853659	ln.mass	0.00270616	0.0848191	0.0875253
Scolopacidae.0	0.103448	ln.mass	0.00135299	0.0972957	0.0986487
Sittidae.0	0.16	ln.mass	0.00321735	0.0346297	0.0378471
Strigidae.0	0.554945	ln.mass	0.00341317	0.0384534	0.0418666
Sturnidae.0	0.66055	ln.mass	0.00371184	0.0205304	0.0242422
Sylviidae.1	0.267327	ln.mass	0.00370981	0.00808916	0.011799
Sylviidae.2	0.39375	ln.mass	0.00221159	0.017087	0.0192986
Sylviidae.3	0.722222	ln.mass	0.00122858	6.82e-10	0.00122858
Thamnophilidae.1	0.854922	ln.mass	0.00273171	1.29e-10	0.00273171
Thamnophilidae.2	0.833333	ln.mass	0.00247981	1.72e-09	0.00247982
Thraupidae.1	0.703704	ln.mass	0.00168774	0.0296196	0.0313074
Thraupidae.2	0.790909	ln.mass	0.00173216	0.00104837	0.00278053
Thraupidae.3	0.798165	ln.mass	0.00134928	0.00258484	0.00393412
Threskiornithidae.0	0.205882	ln.mass	0.00364624	0.0184501	0.0220963
Timaliidae.1	0.62069	ln.mass	0.00357937	7.79e-08	0.00357945
Timaliidae.2	0.465909	ln.mass	0.00381889	0.0092693	0.0130882
Timaliidae.3	0.36	ln.mass	0.00375715	3.65e-08	0.00375719
Timaliidae.4	0.05	ln.mass	0.0042307	0.277273	0.281504
Tinamidae.0	0.531915	ln.mass	0.00297753	3.26e-09	0.00297754
Trochilidae.1	0.694268	ln.mass	0.00192047	0.0127653	0.0146858
Trochilidae.2	0.908257	ln.mass	0.00222661	1.72e-11	0.00222661
Trochilidae.3	0.785714	ln.mass	0.0016144	0.0204243	0.0220387
Trochilidae.4	0.818182	ln.mass	0.00179931	0.00459838	0.00639769
Troglodytidae.0	0.772152	ln.mass	0.00187594	0.00224412	0.00412007
Trogonidae.0	0.72093	ln.mass	0.00271574	2.14e-11	0.00271574
Turdidae.0	0.514793	ln.mass	0.0022651	0.00369318	0.00595828
Turnicidae.0	0.375	ln.mass	0.00310973	1.26e-09	0.00310973
Tyrannidae.1	0.585106	ln.mass	0.00282718	0.00532305	0.00815023
Tyrannidae.2	0.42487	ln.mass	0.00170101	0.0147775	0.0164785
Tyrannidae.3	0.777778	ln.mass	0.00252712	2.26e-09	0.00252712
Tyrannidae.4	0.818182	ln.mass	0.00318438	2.4e-11	0.00318438
Tyrannidae.5	0.71875	ln.mass	0.00270383	0.00139962	0.00410345
Tytonidae.0	0.533333	ln.mass	0.00462006	3.39e-10	0.00462006
Vangidae.0	0.136364	ln.mass	0.00153715	1.33e-08	0.00153717
Viduidae.0	0.631579	ln.mass	0.000637411	0.00063713	0.00127454
Vireonidae.0	0.576923	ln.mass	0.0014888	1.7e-11	0.0014888
Zosteropidae.0	0.888889	ln.mass	0.00423898	0.00362278	0.00786177
Acanthizidae.0	0.375	bill.pPC1	0.00195168	0.00207439	0.00402607
Accipitridae.1	0.230769	bill.pPC1	0.00269108	0.055066	0.057757
Accipitridae.2	0.321429	bill.pPC1	0.00113809	0.00484918	0.00598727
Accipitridae.3	0.285714	bill.pPC1	0.00357237	0.00390779	0.00748017
Aegithalidae.0	0.1	bill.pPC1	0.000958256	0.00458612	0.00554437
Alaudidae.0	0.307692	bill.pPC1	0.00222216	0.02102	0.0232422
Alcedinidae.0	0.623656	bill.pPC1	0.00133924	0.00816188	0.00950112
Anatidae.0	0.0649351	bill.pPC1	0.00248977	0.0166237	0.0191135
Apodidae.0	0.627451	bill.pPC1	0.00572153	0.0136697	0.0193913
Ardeidae.0	0.112903	bill.pPC1	0.00177082	4.43e-08	0.00177086
Artamidae.0	0.363636	bill.pPC1	0.000736574	3.23e-09	0.000736577
Bucconidae.0	0.828571	bill.pPC1	0.00278156	6.69e-10	0.00278156
Bucerotidae.0	0.763636	bill.pPC1	0.00597427	1.1e-07	0.00597438
Campephagidae.0	0.678571	bill.pPC1	0.00141285	6.68e-10	0.00141285
Caprimulgidae.0	0.511111	bill.pPC1	0.00742902	0.0222349	0.0296639
Cardinalidae.0	0.5	bill.pPC1	0.00207655	4.81e-10	0.00207655
Certhiidae.0	0	bill.pPC1	0.00138625	5.04e-10	0.00138625
Charadriidae.0	0.109375	bill.pPC1	0.00164105	0.0183005	0.0199416
Chloropseidae.0	0.636364	bill.pPC1	0.00102759	3.43e-07	0.00102794
Ciconiidae.0	0.157895	bill.pPC1	0.00280225	8.33e-10	0.00280225
Cisticolidae.0	0.587719	bill.pPC1	0.00151957	3e-11	0.00151957
Colluricinclidae.0	0.785714	bill.pPC1	0.00125912	1.04e-09	0.00125913
Columbidae.1	0.767123	bill.pPC1	0.00297406	4.47e-09	0.00297406
Columbidae.2	0.521739	bill.pPC1	0.00303018	0.0132759	0.0163061
Columbidae.3	0.294118	bill.pPC1	0.00374984	0.0644831	0.0682329
Coraciidae.0	0.416667	bill.pPC1	0.00226845	0.0262747	0.0285432
Corvidae.0	0.418803	bill.pPC1	0.00164485	0.00039563	0.00204048
Cotingidae.0	0.75	bill.pPC1	0.00235085	0.00176717	0.00411802
Cracidae.0	0.76	bill.pPC1	0.00390179	1.32e-10	0.00390179
Cracticidae.0	0.545455	bill.pPC1	0.00174454	1.43e-09	0.00174454
Cuculidae.0	0.475177	bill.pPC1	0.00204711	0.00308023	0.00512734
Dendrocolaptidae.0	0.692308	bill.pPC1	0.00128822	1.19e-13	0.00128822
Dicaeidae.0	0.8	bill.pPC1	0.0025081	0.00647417	0.00898228
Dicruridae.0	0.478261	bill.pPC1	0.00146248	4.16e-09	0.00146249
Emberizidae.1	0.370861	bill.pPC1	0.00111816	0.00543111	0.00654926
Emberizidae.2	0.47482	bill.pPC1	0.00204752	3.62e-09	0.00204752
Estrildidae.0	0.698529	bill.pPC1	0.00148856	2.24e-09	0.00148856
Eurylaimidae.0	0.8	bill.pPC1	0.00277347	0.167319	0.170092
Falconidae.0	0.296875	bill.pPC1	0.00221509	0.0107666	0.0129817
Formicariidae.0	0.888889	bill.pPC1	0.00211829	0.0127493	0.0148676
Fringillidae.0	0.369697	bill.pPC1	0.00137409	0.0208258	0.0221999
Furnariidae.2	0.755102	bill.pPC1	0.00207065	0.00164784	0.00371849
Furnariidae.3	0.272727	bill.pPC1	0.00154126	1.84e-09	0.00154126
Galbulidae.0	0.888889	bill.pPC1	0.00302335	9.72e-11	0.00302335
Glareolidae.0	0.333333	bill.pPC1	0.00136867	0.0496617	0.0510303
Gruidae.0	0.0666667	bill.pPC1	0.00274065	0.0896901	0.0924307
Haematopodidae.0	0	bill.pPC1	0.00108961	0.00664655	0.00773615
Hirundinidae.0	0.365854	bill.pPC1	0.00184348	0.00153439	0.00337787
Icteridae.0	0.515152	bill.pPC1	0.00317601	0.00283304	0.00600906
Indicatoridae.0	0.625	bill.pPC1	0.00471307	1.42e-09	0.00471307
Laniidae.0	0.4	bill.pPC1	0.000772456	7.43e-09	0.000772463
Malaconotidae.0	0.660377	bill.pPC1	0.00150916	0.00139186	0.00290102
Maluridae.0	0.407407	bill.pPC1	0.00195968	0.0122773	0.014237
Megapodiidae.0	0.904762	bill.pPC1	0.00280406	5.35e-10	0.00280406
Melanocharitidae.0	1	bill.pPC1	0.00256163	0.0693012	0.0718628
Meliphagidae.0	0.664773	bill.pPC1	0.0022846	1.44e-08	0.00228462
Meropidae.0	0.538462	bill.pPC1	0.00137288	0.0169703	0.0183432
Mimidae.0	0.428571	bill.pPC1	0.00157768	0.00945528	0.011033
Momotidae.0	0.666667	bill.pPC1	0.00188792	2.7e-11	0.00188792
Monarchidae.0	0.84375	bill.pPC1	0.00276674	0.0249862	0.0277529
Motacillidae.0	0.213115	bill.pPC1	0.00103483	0.00792737	0.0089622
Muscicapidae.1	0.266667	bill.pPC1	0.00152194	1.91e-09	0.00152194
Muscicapidae.2	0.540984	bill.pPC1	0.00177789	0.0315535	0.0333314
Muscicapidae.3	0.605263	bill.pPC1	0.00179524	0.00412002	0.00591526
Muscicapidae.4	0.8125	bill.pPC1	0.00143434	1.14e-09	0.00143434
Musophagidae.0	0.826087	bill.pPC1	0.00173235	6.39e-09	0.00173235
Nectariniidae.0	0.733871	bill.pPC1	0.00199204	2.22e-10	0.00199204
Odontophoridae.0	0.677419	bill.pPC1	0.0024581	7.79e-10	0.0024581
Oriolidae.0	0.7	bill.pPC1	0.00119631	0.013813	0.0150093
Otididae.0	0.24	bill.pPC1	0.00383501	2.7e-11	0.00383501
Pachycephalidae.0	0.864865	bill.pPC1	0.000781509	0.0272565	0.028038
Paradisaeidae.0	0.975	bill.pPC1	0.00163337	6.45e-10	0.00163337
Paridae.0	0.215686	bill.pPC1	0.00133976	9.65e-05	0.00143626
Parulidae.0	0.368421	bill.pPC1	0.00147567	0.00520058	0.00667625
Passeridae.0	0.469388	bill.pPC1	0.000788384	0.0184947	0.0192831
Petroicidae.0	0.636364	bill.pPC1	0.00171652	1.49e-12	0.00171652
Phalacrocoracidae.0	0.030303	bill.pPC1	0.0036436	0.114539	0.118183
Phasianidae.0	0.376404	bill.pPC1	0.00345486	0.00104622	0.00450108
Picidae.1	0.452632	bill.pPC1	0.00219755	0.00807272	0.0102703
Picidae.2	0.814815	bill.pPC1	0.00367535	0.0151526	0.018828
Pipridae.0	0.851852	bill.pPC1	0.00167237	0.0131814	0.0148538
Pittidae.0	0.65625	bill.pPC1	0.00211287	1.85e-09	0.00211287
Platysteiridae.0	0.741935	bill.pPC1	0.00134377	1.19e-10	0.00134377
Ploceidae.0	0.707547	bill.pPC1	0.00235575	0.0120953	0.0144511
Podargidae.0	0.8	bill.pPC1	0.00537258	0.0544953	0.0598679
Podicipedidae.0	0.105263	bill.pPC1	0.00371278	6.78e-08	0.00371285
Polioptilidae.0	0.533333	bill.pPC1	0.00167093	2.93e-11	0.00167093
Prunellidae.0	0.0833333	bill.pPC1	0.000553706	0.0116514	0.0122051
Psittacidae.1	0.673077	bill.pPC1	0.00265124	0.0176498	0.0203011
Psittacidae.2	0.677019	bill.pPC1	0.00354551	3.08e-10	0.00354551
Psittacidae.3	0.35	bill.pPC1	0.0024449	0.00567129	0.00811619
Pteroclididae.0	0.125	bill.pPC1	0.00205708	0.059914	0.0619711
Ptilonorhynchidae.0	0.684211	bill.pPC1	0.00145302	3.85e-10	0.00145302
Pycnonotidae.0	0.704	bill.pPC1	0.00184417	0.00512784	0.00697201
Rallidae.0	0.383459	bill.pPC1	0.00362603	1.83e-08	0.00362605
Ramphastidae.0	0.795082	bill.pPC1	0.00173326	8.2e-12	0.00173326
Remizidae.0	0.384615	bill.pPC1	0.00150243	7.31e-09	0.00150243
Rhinocryptidae.0	0.666667	bill.pPC1	0.00318899	0.0106696	0.0138585
Rhipiduridae.0	0.853659	bill.pPC1	0.00218892	0.0412703	0.0434593
Scolopacidae.0	0.103448	bill.pPC1	0.0038119	0.0765525	0.0803644
Sittidae.0	0.16	bill.pPC1	0.000803929	0.000435501	0.00123943
Strigidae.0	0.554945	bill.pPC1	0.00267123	0.00704574	0.00971697
Sturnidae.0	0.66055	bill.pPC1	0.00126031	1.78e-10	0.00126031
Sylviidae.1	0.267327	bill.pPC1	0.0022498	0.0121791	0.0144289
Sylviidae.2	0.39375	bill.pPC1	0.00211621	0.0135111	0.0156273
Sylviidae.3	0.722222	bill.pPC1	0.00150754	9.78e-07	0.00150852
Thamnophilidae.1	0.854922	bill.pPC1	0.00136203	0.00035253	0.00171456
Thamnophilidae.2	0.833333	bill.pPC1	0.00177248	1.66e-10	0.00177248
Thraupidae.1	0.703704	bill.pPC1	0.00118786	0.0394865	0.0406744
Thraupidae.2	0.790909	bill.pPC1	0.00160261	0.000376249	0.00197886
Thraupidae.3	0.798165	bill.pPC1	0.00162142	2.21e-11	0.00162142
Threskiornithidae.0	0.205882	bill.pPC1	0.00396204	0.00821984	0.0121819
Timaliidae.1	0.62069	bill.pPC1	0.00161328	0.000521238	0.00213452
Timaliidae.2	0.465909	bill.pPC1	0.00124807	0.00502889	0.00627696
Timaliidae.3	0.36	bill.pPC1	0.00159497	0.00491193	0.00650689
Timaliidae.4	0.05	bill.pPC1	0.00237774	5.39e-09	0.00237775
Tinamidae.0	0.531915	bill.pPC1	0.00488059	0.00716441	0.012045
Trochilidae.1	0.694268	bill.pPC1	0.0053772	0.0152297	0.0206069
Trochilidae.2	0.908257	bill.pPC1	0.00554656	0.0206141	0.0261606
Trochilidae.3	0.785714	bill.pPC1	0.0157422	0.0342055	0.0499477
Trochilidae.4	0.818182	bill.pPC1	0.00359657	7.53e-11	0.00359657
Troglodytidae.0	0.772152	bill.pPC1	0.00172868	1.04e-10	0.00172868
Trogonidae.0	0.72093	bill.pPC1	0.00143733	0.00664026	0.00807759
Turdidae.0	0.514793	bill.pPC1	0.00216528	0.00216443	0.00432971
Turnicidae.0	0.375	bill.pPC1	0.00912198	0.16561	0.174732
Tyrannidae.1	0.585106	bill.pPC1	0.0018576	0.0148034	0.016661
Tyrannidae.2	0.42487	bill.pPC1	0.00143548	0.0101594	0.0115949
Tyrannidae.3	0.777778	bill.pPC1	0.00147686	7.13e-09	0.00147687
Tyrannidae.4	0.818182	bill.pPC1	0.00306437	2.39e-11	0.00306437
Tyrannidae.5	0.71875	bill.pPC1	0.00389598	0.00260375	0.00649972
Tytonidae.0	0.533333	bill.pPC1	0.00259764	0.0519567	0.0545543
Vangidae.0	0.136364	bill.pPC1	0.00252441	6.48e-09	0.00252441
Viduidae.0	0.631579	bill.pPC1	0.00053426	1.96e-09	0.000534262
Vireonidae.0	0.576923	bill.pPC1	0.0010273	1.76e-09	0.0010273
Zosteropidae.0	0.888889	bill.pPC1	0.00202194	0.0323111	0.034333
Acanthizidae.0	0.375	bill.pPC2	0.00115657	3.1e-10	0.00115657
Accipitridae.1	0.230769	bill.pPC2	0.000974773	0.0245116	0.0254863
Accipitridae.2	0.321429	bill.pPC2	0.000636987	0.0085656	0.00920258
Accipitridae.3	0.285714	bill.pPC2	0.000915292	0.00158751	0.00250281
Aegithalidae.0	0.1	bill.pPC2	0.000733108	9.07e-10	0.000733109
Alaudidae.0	0.307692	bill.pPC2	0.00118505	0.000918793	0.00210384
Alcedinidae.0	0.623656	bill.pPC2	0.000486344	4.76e-11	0.000486344
Anatidae.0	0.0649351	bill.pPC2	0.00072725	0.00405422	0.00478147
Apodidae.0	0.627451	bill.pPC2	0.00270992	0.020439	0.0231489
Ardeidae.0	0.112903	bill.pPC2	0.000545448	1.26e-09	0.000545449
Artamidae.0	0.363636	bill.pPC2	0.000633017	1.91e-10	0.000633017
Bucconidae.0	0.828571	bill.pPC2	0.000779002	1.88e-08	0.000779021
Bucerotidae.0	0.763636	bill.pPC2	0.000904321	0.00117518	0.0020795
Campephagidae.0	0.678571	bill.pPC2	0.000550567	0.000805907	0.00135647
Caprimulgidae.0	0.511111	bill.pPC2	0.0045417	0.0143073	0.018849
Cardinalidae.0	0.5	bill.pPC2	0.000955977	0.000221391	0.00117737
Certhiidae.0	0	bill.pPC2	0.000777251	0.00549539	0.00627264
Charadriidae.0	0.109375	bill.pPC2	0.000892591	0.00446556	0.00535815
Chloropseidae.0	0.636364	bill.pPC2	0.00067429	0.00534979	0.00602408
Ciconiidae.0	0.157895	bill.pPC2	0.000924127	8.64e-10	0.000924128
Cisticolidae.0	0.587719	bill.pPC2	0.00069839	0.000744989	0.00144338
Colluricinclidae.0	0.785714	bill.pPC2	0.00124286	0.0076758	0.00891867
Columbidae.1	0.767123	bill.pPC2	0.00223916	1.39e-08	0.00223917
Columbidae.2	0.521739	bill.pPC2	0.00163693	0.00510097	0.0067379
Columbidae.3	0.294118	bill.pPC2	0.0029656	0.01263	0.0155956
Coraciidae.0	0.416667	bill.pPC2	0.000533164	5.24e-10	0.000533165
Corvidae.0	0.418803	bill.pPC2	0.000798551	0.0015467	0.00234525
Cotingidae.0	0.75	bill.pPC2	0.00104812	0.00326348	0.0043116
Cracidae.0	0.76	bill.pPC2	0.00116365	0.00618663	0.00735028
Cracticidae.0	0.545455	bill.pPC2	0.000952099	2.09e-08	0.00095212
Cuculidae.0	0.475177	bill.pPC2	0.000886591	0.000962012	0.0018486
Dendrocolaptidae.0	0.692308	bill.pPC2	0.000794005	6.04e-09	0.000794011
Dicaeidae.0	0.8	bill.pPC2	0.00149337	0.00417165	0.00566501
Dicruridae.0	0.478261	bill.pPC2	0.000507135	0.00170249	0.00220962
Emberizidae.1	0.370861	bill.pPC2	0.000748872	0.00508975	0.00583862
Emberizidae.2	0.47482	bill.pPC2	0.00146061	0.00511677	0.00657739
Estrildidae.0	0.698529	bill.pPC2	0.000719404	0.000726738	0.00144614
Eurylaimidae.0	0.8	bill.pPC2	0.00100779	0.00670339	0.00771118
Falconidae.0	0.296875	bill.pPC2	0.000624059	0.00352219	0.00414624
Formicariidae.0	0.888889	bill.pPC2	0.00113275	0.000705571	0.00183832
Fringillidae.0	0.369697	bill.pPC2	0.000708748	0.00509901	0.00580776
Furnariidae.2	0.755102	bill.pPC2	0.00105054	0.000791701	0.00184224
Furnariidae.3	0.272727	bill.pPC2	0.000777781	0.0151167	0.0158945
Galbulidae.0	0.888889	bill.pPC2	0.00132332	2.57e-09	0.00132332
Glareolidae.0	0.333333	bill.pPC2	0.000838115	0.000373246	0.00121136
Gruidae.0	0.0666667	bill.pPC2	0.00126885	2.42e-11	0.00126885
Haematopodidae.0	0	bill.pPC2	0.000971199	0.00927839	0.0102496
Hirundinidae.0	0.365854	bill.pPC2	0.000971319	0.00274672	0.00371804
Icteridae.0	0.515152	bill.pPC2	0.00104369	0.00148807	0.00253176
Indicatoridae.0	0.625	bill.pPC2	0.00155937	3.99e-10	0.00155937
Laniidae.0	0.4	bill.pPC2	0.000376031	0.00319695	0.00357298
Malaconotidae.0	0.660377	bill.pPC2	0.000738466	0.000180466	0.000918932
Maluridae.0	0.407407	bill.pPC2	0.000809689	0.0110512	0.0118609
Megapodiidae.0	0.904762	bill.pPC2	0.00175949	0.00194542	0.00370491
Melanocharitidae.0	1	bill.pPC2	0.000749508	1.8e-10	0.000749508
Meliphagidae.0	0.664773	bill.pPC2	0.0007718	0.00133251	0.00210431
Meropidae.0	0.538462	bill.pPC2	0.000651413	0.00232805	0.00297947
Mimidae.0	0.428571	bill.pPC2	0.000619269	0.00291836	0.00353763
Momotidae.0	0.666667	bill.pPC2	0.000594729	0.00139813	0.00199286
Monarchidae.0	0.84375	bill.pPC2	0.00184143	0.000725568	0.00256699
Motacillidae.0	0.213115	bill.pPC2	0.000913269	0.00051082	0.00142409
Muscicapidae.1	0.266667	bill.pPC2	0.000926037	0.000352729	0.00127877
Muscicapidae.2	0.540984	bill.pPC2	0.000802046	0.0017587	0.00256075
Muscicapidae.3	0.605263	bill.pPC2	0.00077589	0.00146002	0.00223592
Muscicapidae.4	0.8125	bill.pPC2	0.000847876	4.07e-05	0.000888576
Musophagidae.0	0.826087	bill.pPC2	0.00120498	1.33e-08	0.00120499
Nectariniidae.0	0.733871	bill.pPC2	0.000771408	8.43e-10	0.000771409
Odontophoridae.0	0.677419	bill.pPC2	0.000858167	0.00223036	0.00308853
Oriolidae.0	0.7	bill.pPC2	0.000549377	0.000465388	0.00101476
Otididae.0	0.24	bill.pPC2	0.000964063	0.00261242	0.00357648
Pachycephalidae.0	0.864865	bill.pPC2	0.000329209	0.00273871	0.00306791
Paradisaeidae.0	0.975	bill.pPC2	0.000943178	1.21e-08	0.00094319
Paridae.0	0.215686	bill.pPC2	0.000783992	0.00160513	0.00238912
Parulidae.0	0.368421	bill.pPC2	0.000901956	0.00547639	0.00637835
Passeridae.0	0.469388	bill.pPC2	0.000465893	0.00062111	0.001087
Petroicidae.0	0.636364	bill.pPC2	0.00104477	1.09e-09	0.00104478
Phalacrocoracidae.0	0.030303	bill.pPC2	0.00111541	5.08e-11	0.00111541
Phasianidae.0	0.376404	bill.pPC2	0.000890257	0.000451763	0.00134202
Picidae.1	0.452632	bill.pPC2	0.00085919	0.0015423	0.00240149
Picidae.2	0.814815	bill.pPC2	0.00140868	0.00331936	0.00472804
Pipridae.0	0.851852	bill.pPC2	0.00104308	0.0115492	0.0125922
Pittidae.0	0.65625	bill.pPC2	0.000792711	0.000435752	0.00122846
Platysteiridae.0	0.741935	bill.pPC2	0.000497227	6.94e-10	0.000497228
Ploceidae.0	0.707547	bill.pPC2	0.0011678	0.00358314	0.00475094
Podargidae.0	0.8	bill.pPC2	0.000683069	0.000451594	0.00113466
Podicipedidae.0	0.105263	bill.pPC2	0.00108869	7.35e-11	0.00108869
Polioptilidae.0	0.533333	bill.pPC2	0.00137297	2.91e-11	0.00137297
Prunellidae.0	0.0833333	bill.pPC2	0.000197257	0.00108175	0.001279
Psittacidae.1	0.673077	bill.pPC2	0.000627084	0.000680638	0.00130772
Psittacidae.2	0.677019	bill.pPC2	0.000970357	0.000603331	0.00157369
Psittacidae.3	0.35	bill.pPC2	0.000458567	0.0143457	0.0148043
Pteroclididae.0	0.125	bill.pPC2	0.001037	0.0208884	0.0219254
Ptilonorhynchidae.0	0.684211	bill.pPC2	0.000924892	0.000618955	0.00154385
Pycnonotidae.0	0.704	bill.pPC2	0.000790979	0.000273906	0.00106489
Rallidae.0	0.383459	bill.pPC2	0.00170022	0.00659676	0.00829698
Ramphastidae.0	0.795082	bill.pPC2	0.000785664	1.32e-06	0.000786984
Remizidae.0	0.384615	bill.pPC2	0.00105023	1.76e-09	0.00105023
Rhinocryptidae.0	0.666667	bill.pPC2	0.00177978	0.00351201	0.00529179
Rhipiduridae.0	0.853659	bill.pPC2	0.00104019	1.29e-10	0.00104019
Scolopacidae.0	0.103448	bill.pPC2	0.00127787	0.00852566	0.00980353
Sittidae.0	0.16	bill.pPC2	0.000542983	0.00279968	0.00334266
Strigidae.0	0.554945	bill.pPC2	0.00137433	0.00260852	0.00398285
Sturnidae.0	0.66055	bill.pPC2	0.000600632	0.000841103	0.00144173
Sylviidae.1	0.267327	bill.pPC2	0.00158968	0.00677543	0.00836511
Sylviidae.2	0.39375	bill.pPC2	0.000997378	0.00302993	0.00402731
Sylviidae.3	0.722222	bill.pPC2	0.000685591	0.0110331	0.0117187
Thamnophilidae.1	0.854922	bill.pPC2	0.00084652	0.00129768	0.0021442
Thamnophilidae.2	0.833333	bill.pPC2	0.000720992	0.00680798	0.00752898
Thraupidae.1	0.703704	bill.pPC2	0.00131531	0.00272342	0.00403873
Thraupidae.2	0.790909	bill.pPC2	0.00119228	0.00130689	0.00249916
Thraupidae.3	0.798165	bill.pPC2	0.00129531	0.00470451	0.00599982
Threskiornithidae.0	0.205882	bill.pPC2	0.00137734	0.00369291	0.00507025
Timaliidae.1	0.62069	bill.pPC2	0.000765339	0.00161268	0.00237802
Timaliidae.2	0.465909	bill.pPC2	0.000546404	0.000473059	0.00101946
Timaliidae.3	0.36	bill.pPC2	0.000527049	0.00541392	0.00594097
Timaliidae.4	0.05	bill.pPC2	0.000792914	2.83e-10	0.000792914
Tinamidae.0	0.531915	bill.pPC2	0.00402653	8.12e-10	0.00402653
Trochilidae.1	0.694268	bill.pPC2	0.00242179	0.00765144	0.0100732
Trochilidae.2	0.908257	bill.pPC2	0.00257678	0.00739323	0.00997001
Trochilidae.3	0.785714	bill.pPC2	0.00312584	3.03e-12	0.00312584
Trochilidae.4	0.818182	bill.pPC2	0.00141742	6.03e-09	0.00141742
Troglodytidae.0	0.772152	bill.pPC2	0.0012034	0.000479643	0.00168305
Trogonidae.0	0.72093	bill.pPC2	0.000655522	0.00185865	0.00251417
Turdidae.0	0.514793	bill.pPC2	0.00086608	0.00318864	0.00405472
Turnicidae.0	0.375	bill.pPC2	0.00172707	1.05e-09	0.00172707
Tyrannidae.1	0.585106	bill.pPC2	0.00118088	0.0049843	0.00616519
Tyrannidae.2	0.42487	bill.pPC2	0.000898995	0.000665878	0.00156487
Tyrannidae.3	0.777778	bill.pPC2	0.00240811	0.00652216	0.00893028
Tyrannidae.4	0.818182	bill.pPC2	0.00155465	0.0148114	0.0163661
Tyrannidae.5	0.71875	bill.pPC2	0.0012927	0.00542999	0.00672269
Tytonidae.0	0.533333	bill.pPC2	0.00133202	0.00331877	0.00465079
Vangidae.0	0.136364	bill.pPC2	0.00124643	1.17e-09	0.00124643
Viduidae.0	0.631579	bill.pPC2	0.000283169	0.00287269	0.00315586
Vireonidae.0	0.576923	bill.pPC2	0.000728273	1.99e-09	0.000728275
Zosteropidae.0	0.888889	bill.pPC2	0.0010187	0.0040038	0.0050225
Acanthizidae.0	0.375	bill.pPC3	0.0013243	3.72e-09	0.0013243
Accipitridae.1	0.230769	bill.pPC3	0.00113917	0.00292716	0.00406633
Accipitridae.2	0.321429	bill.pPC3	0.000402957	2.6e-10	0.000402957
Accipitridae.3	0.285714	bill.pPC3	0.000908475	0.000460945	0.00136942
Aegithalidae.0	0.1	bill.pPC3	0.000692419	0.0046054	0.00529782
Alaudidae.0	0.307692	bill.pPC3	0.000518669	9.3e-11	0.000518669
Alcedinidae.0	0.623656	bill.pPC3	0.00045487	3e-09	0.000454873
Anatidae.0	0.0649351	bill.pPC3	0.000979945	0.0015344	0.00251435
Apodidae.0	0.627451	bill.pPC3	0.00390808	0.00223164	0.00613971
Ardeidae.0	0.112903	bill.pPC3	0.000531647	1.8e-10	0.000531647
Artamidae.0	0.363636	bill.pPC3	0.0007463	3.08e-10	0.0007463
Bucconidae.0	0.828571	bill.pPC3	0.00107788	0.00153478	0.00261266
Bucerotidae.0	0.763636	bill.pPC3	0.000784099	2.98e-09	0.000784102
Campephagidae.0	0.678571	bill.pPC3	0.000555566	0.00311416	0.00366972
Caprimulgidae.0	0.511111	bill.pPC3	0.00423534	0.004622	0.00885734
Cardinalidae.0	0.5	bill.pPC3	0.000903327	0.00118514	0.00208847
Certhiidae.0	0	bill.pPC3	0.000973824	0.00335682	0.00433065
Charadriidae.0	0.109375	bill.pPC3	0.00112429	0.00193443	0.00305872
Chloropseidae.0	0.636364	bill.pPC3	0.0005391	0.00137346	0.00191256
Ciconiidae.0	0.157895	bill.pPC3	0.00068155	1.17e-11	0.00068155
Cisticolidae.0	0.587719	bill.pPC3	0.000781691	1.07e-09	0.000781692
Colluricinclidae.0	0.785714	bill.pPC3	0.000565835	1.25e-09	0.000565836
Columbidae.1	0.767123	bill.pPC3	0.00166846	2.2e-10	0.00166846
Columbidae.2	0.521739	bill.pPC3	0.00157236	0.00421168	0.00578404
Columbidae.3	0.294118	bill.pPC3	0.00298615	0.000518104	0.00350426
Coraciidae.0	0.416667	bill.pPC3	0.000731156	2.96e-11	0.000731156
Corvidae.0	0.418803	bill.pPC3	0.000571258	1.09e-10	0.000571258
Cotingidae.0	0.75	bill.pPC3	0.000774605	0.00198633	0.00276093
Cracidae.0	0.76	bill.pPC3	0.00107213	0.0025103	0.00358243
Cracticidae.0	0.545455	bill.pPC3	0.000480226	4.93e-11	0.000480226
Cuculidae.0	0.475177	bill.pPC3	0.000896901	0.00154858	0.00244548
Dendrocolaptidae.0	0.692308	bill.pPC3	0.000826518	0.000232806	0.00105932
Dicaeidae.0	0.8	bill.pPC3	0.00104487	5.93e-10	0.00104487
Dicruridae.0	0.478261	bill.pPC3	0.000441049	1.01e-09	0.00044105
Emberizidae.1	0.370861	bill.pPC3	0.000717391	0.00207974	0.00279713
Emberizidae.2	0.47482	bill.pPC3	0.00109216	0.00222407	0.00331623
Estrildidae.0	0.698529	bill.pPC3	0.000593758	0.00021935	0.000813108
Eurylaimidae.0	0.8	bill.pPC3	0.000908548	4.49e-08	0.000908593
Falconidae.0	0.296875	bill.pPC3	0.000632864	0.0017251	0.00235796
Formicariidae.0	0.888889	bill.pPC3	0.000842926	2.92e-10	0.000842926
Fringillidae.0	0.369697	bill.pPC3	0.000452155	0.000584831	0.00103699
Furnariidae.2	0.755102	bill.pPC3	0.00112444	0.00202181	0.00314625
Furnariidae.3	0.272727	bill.pPC3	0.00076773	4.54e-11	0.00076773
Galbulidae.0	0.888889	bill.pPC3	0.000719712	1.27e-07	0.000719839
Glareolidae.0	0.333333	bill.pPC3	0.00072092	0.000141837	0.000862757
Gruidae.0	0.0666667	bill.pPC3	0.000668111	2.93e-11	0.000668111
Haematopodidae.0	0	bill.pPC3	0.000844457	0.00138549	0.00222995
Hirundinidae.0	0.365854	bill.pPC3	0.00126408	0.00357616	0.00484023
Icteridae.0	0.515152	bill.pPC3	0.000571608	0.00158209	0.0021537
Indicatoridae.0	0.625	bill.pPC3	0.00120525	2.71e-05	0.00123235
Laniidae.0	0.4	bill.pPC3	0.000404222	0.00317802	0.00358224
Malaconotidae.0	0.660377	bill.pPC3	0.00060829	0.000487258	0.00109555
Maluridae.0	0.407407	bill.pPC3	0.000628727	0.000861449	0.00149018
Megapodiidae.0	0.904762	bill.pPC3	0.00131182	1.29e-10	0.00131182
Melanocharitidae.0	1	bill.pPC3	0.00120884	5.3e-12	0.00120884
Meliphagidae.0	0.664773	bill.pPC3	0.000968582	0.00196157	0.00293015
Meropidae.0	0.538462	bill.pPC3	0.000722494	0.00531543	0.00603792
Mimidae.0	0.428571	bill.pPC3	0.000764484	0.000471572	0.00123606
Momotidae.0	0.666667	bill.pPC3	0.00170079	0.00192558	0.00362636
Monarchidae.0	0.84375	bill.pPC3	0.00142108	7.35e-11	0.00142108
Motacillidae.0	0.213115	bill.pPC3	0.000576781	0.00177929	0.00235607
Muscicapidae.1	0.266667	bill.pPC3	0.000984528	0.000390345	0.00137487
Muscicapidae.2	0.540984	bill.pPC3	0.00119615	0.00219696	0.00339311
Muscicapidae.3	0.605263	bill.pPC3	0.00138661	0.000529573	0.00191618
Muscicapidae.4	0.8125	bill.pPC3	0.000834788	0.00364426	0.00447905
Musophagidae.0	0.826087	bill.pPC3	0.000956406	2.48e-09	0.000956408
Nectariniidae.0	0.733871	bill.pPC3	0.0010332	2.65e-10	0.0010332
Odontophoridae.0	0.677419	bill.pPC3	0.000998316	0.0010536	0.00205192
Oriolidae.0	0.7	bill.pPC3	0.000479007	0.00231921	0.00279822
Otididae.0	0.24	bill.pPC3	0.000767408	0.00506676	0.00583417
Pachycephalidae.0	0.864865	bill.pPC3	0.000449831	0.00109372	0.00154355
Paradisaeidae.0	0.975	bill.pPC3	0.00131802	0.000560574	0.00187859
Paridae.0	0.215686	bill.pPC3	0.000485302	6.34e-10	0.000485303
Parulidae.0	0.368421	bill.pPC3	0.000983636	0.00142742	0.00241105
Passeridae.0	0.469388	bill.pPC3	0.000314451	0.000945238	0.00125969
Petroicidae.0	0.636364	bill.pPC3	0.00095284	1.24e-10	0.00095284
Phalacrocoracidae.0	0.030303	bill.pPC3	0.00133664	3.55e-09	0.00133665
Phasianidae.0	0.376404	bill.pPC3	0.000998057	0.00112799	0.00212605
Picidae.1	0.452632	bill.pPC3	0.000862989	0.000159382	0.00102237
Picidae.2	0.814815	bill.pPC3	0.00166975	0.00174678	0.00341653
Pipridae.0	0.851852	bill.pPC3	0.000969697	0.00607651	0.00704621
Pittidae.0	0.65625	bill.pPC3	0.00071116	0.000593894	0.00130505
Platysteiridae.0	0.741935	bill.pPC3	0.000979475	0.00434652	0.00532599
Ploceidae.0	0.707547	bill.pPC3	0.00060062	0.00103269	0.00163331
Podargidae.0	0.8	bill.pPC3	0.00126927	1.18e-10	0.00126927
Podicipedidae.0	0.105263	bill.pPC3	0.000808811	0.00473624	0.00554505
Polioptilidae.0	0.533333	bill.pPC3	0.00137843	0.00185488	0.00323331
Prunellidae.0	0.0833333	bill.pPC3	0.000308355	3.95e-10	0.000308355
Psittacidae.1	0.673077	bill.pPC3	0.000643976	0.00119416	0.00183814
Psittacidae.2	0.677019	bill.pPC3	0.00177652	0.000879613	0.00265613
Psittacidae.3	0.35	bill.pPC3	0.000405042	4.76e-11	0.000405042
Pteroclididae.0	0.125	bill.pPC3	0.000602869	0.00159716	0.00220003
Ptilonorhynchidae.0	0.684211	bill.pPC3	0.000684126	1.41e-09	0.000684127
Pycnonotidae.0	0.704	bill.pPC3	0.000784642	0.000183449	0.000968091
Rallidae.0	0.383459	bill.pPC3	0.00148424	0.00199457	0.00347881
Ramphastidae.0	0.795082	bill.pPC3	0.000651356	0.000498019	0.00114938
Remizidae.0	0.384615	bill.pPC3	0.000849266	0.00101218	0.00186145
Rhinocryptidae.0	0.666667	bill.pPC3	0.00135655	0.00219906	0.00355561
Rhipiduridae.0	0.853659	bill.pPC3	0.00163467	5.92e-11	0.00163467
Scolopacidae.0	0.103448	bill.pPC3	0.00122686	0.000605699	0.00183256
Sittidae.0	0.16	bill.pPC3	0.000444996	0.00424292	0.00468791
Strigidae.0	0.554945	bill.pPC3	0.00131498	0.00145889	0.00277387
Sturnidae.0	0.66055	bill.pPC3	0.000689679	0.000676386	0.00136607
Sylviidae.1	0.267327	bill.pPC3	0.00129112	0.00257254	0.00386366
Sylviidae.2	0.39375	bill.pPC3	0.00120561	0.00093545	0.00214106
Sylviidae.3	0.722222	bill.pPC3	0.00101312	3.08e-10	0.00101312
Thamnophilidae.1	0.854922	bill.pPC3	0.00108188	0.000195433	0.00127732
Thamnophilidae.2	0.833333	bill.pPC3	0.00264547	8.9e-09	0.00264548
Thraupidae.1	0.703704	bill.pPC3	0.000726644	0.00485808	0.00558472
Thraupidae.2	0.790909	bill.pPC3	0.000831532	0.000321668	0.0011532
Thraupidae.3	0.798165	bill.pPC3	0.000909349	0.000257465	0.00116681
Threskiornithidae.0	0.205882	bill.pPC3	0.000719332	1.62e-10	0.000719332
Timaliidae.1	0.62069	bill.pPC3	0.000890614	0.00214773	0.00303834
Timaliidae.2	0.465909	bill.pPC3	0.00062055	0.000360335	0.000980885
Timaliidae.3	0.36	bill.pPC3	0.0006245	0.000211292	0.000835792
Timaliidae.4	0.05	bill.pPC3	0.00123396	5.08e-05	0.00128476
Tinamidae.0	0.531915	bill.pPC3	0.000875612	6.05e-10	0.000875613
Trochilidae.1	0.694268	bill.pPC3	0.0041212	0.0169832	0.0211044
Trochilidae.2	0.908257	bill.pPC3	0.00495628	0.00471205	0.00966834
Trochilidae.3	0.785714	bill.pPC3	0.00373595	0.00717973	0.0109157
Trochilidae.4	0.818182	bill.pPC3	0.00305999	0.0030466	0.00610659
Troglodytidae.0	0.772152	bill.pPC3	0.000831236	1.33e-09	0.000831237
Trogonidae.0	0.72093	bill.pPC3	0.000783893	0.00451897	0.00530287
Turdidae.0	0.514793	bill.pPC3	0.00094507	0.000694585	0.00163966
Turnicidae.0	0.375	bill.pPC3	0.00174645	3.64e-10	0.00174645
Tyrannidae.1	0.585106	bill.pPC3	0.00131372	0.00205724	0.00337096
Tyrannidae.2	0.42487	bill.pPC3	0.000937809	0.000518966	0.00145677
Tyrannidae.3	0.777778	bill.pPC3	0.00225437	1.3e-09	0.00225437
Tyrannidae.4	0.818182	bill.pPC3	0.00151259	6.28e-10	0.00151259
Tyrannidae.5	0.71875	bill.pPC3	0.0016558	8.4e-09	0.00165581
Tytonidae.0	0.533333	bill.pPC3	0.000872493	0.00348006	0.00435255
Vangidae.0	0.136364	bill.pPC3	0.00156377	2.63e-09	0.00156377
Viduidae.0	0.631579	bill.pPC3	0.000318546	1.2e-09	0.000318547
Vireonidae.0	0.576923	bill.pPC3	0.000826611	0.000684037	0.00151065
Zosteropidae.0	0.888889	bill.pPC3	0.00132425	0.00342636	0.00475061
Acanthizidae.0	0.375	wtt.pPC1	0.00161089	9.15e-05	0.00170239
Accipitridae.1	0.230769	wtt.pPC1	0.00216766	2.85e-09	0.00216766
Accipitridae.2	0.321429	wtt.pPC1	0.00113352	0.0150056	0.0161391
Accipitridae.3	0.285714	wtt.pPC1	0.00285117	0.00641074	0.00926192
Aegithalidae.0	0.1	wtt.pPC1	0.00091325	0.000479362	0.00139261
Alaudidae.0	0.307692	wtt.pPC1	0.00202741	0.00604815	0.00807556
Alcedinidae.0	0.623656	wtt.pPC1	0.00142973	0.0130611	0.0144908
Anatidae.0	0.0649351	wtt.pPC1	0.00300201	0.00580003	0.00880203
Apodidae.0	0.627451	wtt.pPC1	0.00167486	0.0067849	0.00845976
Ardeidae.0	0.112903	wtt.pPC1	0.00229767	3.26e-07	0.002298
Artamidae.0	0.363636	wtt.pPC1	0.000957449	3.25e-10	0.000957449
Bucconidae.0	0.828571	wtt.pPC1	0.00149023	9.88e-10	0.00149023
Bucerotidae.0	0.763636	wtt.pPC1	0.0025634	0.0021176	0.004681
Campephagidae.0	0.678571	wtt.pPC1	0.00113918	0.0116117	0.0127508
Caprimulgidae.0	0.511111	wtt.pPC1	0.00389228	0.0752123	0.0791046
Cardinalidae.0	0.5	wtt.pPC1	0.000848721	4.91e-11	0.000848721
Certhiidae.0	0	wtt.pPC1	0.000735043	0.010594	0.011329
Charadriidae.0	0.109375	wtt.pPC1	0.000912059	2.25e-10	0.000912059
Chloropseidae.0	0.636364	wtt.pPC1	0.00131127	0.0164297	0.0177409
Ciconiidae.0	0.157895	wtt.pPC1	0.0021953	4.32e-10	0.0021953
Cisticolidae.0	0.587719	wtt.pPC1	0.00268028	1.03e-09	0.00268028
Colluricinclidae.0	0.785714	wtt.pPC1	0.00109201	0.0402545	0.0413465
Columbidae.1	0.767123	wtt.pPC1	0.00165054	1.86e-09	0.00165054
Columbidae.2	0.521739	wtt.pPC1	0.0016033	0.0107772	0.0123805
Columbidae.3	0.294118	wtt.pPC1	0.00100644	0.00453415	0.00554059
Coraciidae.0	0.416667	wtt.pPC1	0.00103663	0.00541471	0.00645135
Corvidae.0	0.418803	wtt.pPC1	0.0015085	0.00607155	0.00758005
Cotingidae.0	0.75	wtt.pPC1	0.00117268	2.6e-10	0.00117268
Cracidae.0	0.76	wtt.pPC1	0.00119776	9.79e-11	0.00119776
Cracticidae.0	0.545455	wtt.pPC1	0.000981017	9.6e-09	0.000981027
Cuculidae.0	0.475177	wtt.pPC1	0.00158747	0.00616534	0.00775281
Dendrocolaptidae.0	0.692308	wtt.pPC1	0.00156632	2.75e-10	0.00156632
Dicaeidae.0	0.8	wtt.pPC1	0.00218444	0.0059602	0.00814465
Dicruridae.0	0.478261	wtt.pPC1	0.00163804	0.0581767	0.0598147
Emberizidae.1	0.370861	wtt.pPC1	0.00130137	0.00214974	0.00345111
Emberizidae.2	0.47482	wtt.pPC1	0.00158728	2.77e-09	0.00158728
Estrildidae.0	0.698529	wtt.pPC1	0.00209669	0.000863118	0.00295981
Eurylaimidae.0	0.8	wtt.pPC1	0.00157493	0.0992841	0.100859
Falconidae.0	0.296875	wtt.pPC1	0.00175072	5.29e-11	0.00175072
Formicariidae.0	0.888889	wtt.pPC1	0.00198281	7.62e-11	0.00198281
Fringillidae.0	0.369697	wtt.pPC1	0.00113354	0.00591934	0.00705288
Furnariidae.2	0.755102	wtt.pPC1	0.00188102	6.61e-08	0.00188109
Furnariidae.3	0.272727	wtt.pPC1	0.00116667	0.0314455	0.0326122
Galbulidae.0	0.888889	wtt.pPC1	0.00145982	2.16e-08	0.00145984
Glareolidae.0	0.333333	wtt.pPC1	0.00130982	0.0865051	0.087815
Gruidae.0	0.0666667	wtt.pPC1	0.00168482	0.0356077	0.0372925
Haematopodidae.0	0	wtt.pPC1	0.00068248	0.00447572	0.0051582
Hirundinidae.0	0.365854	wtt.pPC1	0.00191941	0.0101184	0.0120378
Icteridae.0	0.515152	wtt.pPC1	0.00339591	0.0005633	0.00395921
Indicatoridae.0	0.625	wtt.pPC1	0.00208303	8.57e-10	0.00208303
Laniidae.0	0.4	wtt.pPC1	0.000870029	0.0922292	0.0930993
Malaconotidae.0	0.660377	wtt.pPC1	0.000818361	0.00573567	0.00655403
Maluridae.0	0.407407	wtt.pPC1	0.00115826	0.0241556	0.0253139
Megapodiidae.0	0.904762	wtt.pPC1	0.00274728	2.1e-10	0.00274728
Melanocharitidae.0	1	wtt.pPC1	0.00216356	0.0660286	0.0681922
Meliphagidae.0	0.664773	wtt.pPC1	0.00166082	0.00279721	0.00445804
Meropidae.0	0.538462	wtt.pPC1	0.00218062	1.58e-07	0.00218077
Mimidae.0	0.428571	wtt.pPC1	0.0021328	0.0175884	0.0197212
Momotidae.0	0.666667	wtt.pPC1	0.00116056	0.015738	0.0168986
Monarchidae.0	0.84375	wtt.pPC1	0.00386302	0.0143167	0.0181797
Motacillidae.0	0.213115	wtt.pPC1	0.00100362	0.0129298	0.0139334
Muscicapidae.1	0.266667	wtt.pPC1	0.00153506	0.0022252	0.00376026
Muscicapidae.2	0.540984	wtt.pPC1	0.00154749	0.0270932	0.0286407
Muscicapidae.3	0.605263	wtt.pPC1	0.00244365	0.00128743	0.00373108
Muscicapidae.4	0.8125	wtt.pPC1	0.00215693	1.9e-12	0.00215693
Musophagidae.0	0.826087	wtt.pPC1	0.000669581	1.13e-10	0.000669581
Nectariniidae.0	0.733871	wtt.pPC1	0.00713764	0.027883	0.0350206
Odontophoridae.0	0.677419	wtt.pPC1	0.00199658	5.05e-11	0.00199658
Oriolidae.0	0.7	wtt.pPC1	0.00125336	0.00566391	0.00691727
Otididae.0	0.24	wtt.pPC1	0.00597904	5.9e-12	0.00597904
Pachycephalidae.0	0.864865	wtt.pPC1	0.000732479	0.00929299	0.0100255
Paradisaeidae.0	0.975	wtt.pPC1	0.0108567	0.00282362	0.0136803
Paridae.0	0.215686	wtt.pPC1	0.00099782	0.011169	0.0121668
Parulidae.0	0.368421	wtt.pPC1	0.000810754	0.00275593	0.00356668
Passeridae.0	0.469388	wtt.pPC1	0.00101127	0.00690873	0.00792
Petroicidae.0	0.636364	wtt.pPC1	0.00141398	6.47e-12	0.00141398
Phalacrocoracidae.0	0.030303	wtt.pPC1	0.00143676	0.0290295	0.0304663
Phasianidae.0	0.376404	wtt.pPC1	0.010318	0.000330586	0.0106485
Picidae.1	0.452632	wtt.pPC1	0.00148887	0.00433096	0.00581982
Picidae.2	0.814815	wtt.pPC1	0.00155596	5.33e-09	0.00155597
Pipridae.0	0.851852	wtt.pPC1	0.0028116	0.00728863	0.0101002
Pittidae.0	0.65625	wtt.pPC1	0.00206973	0.0346595	0.0367292
Platysteiridae.0	0.741935	wtt.pPC1	0.0010915	4.95e-08	0.00109155
Ploceidae.0	0.707547	wtt.pPC1	0.00833791	0.0128876	0.0212256
Podargidae.0	0.8	wtt.pPC1	0.00161697	0.0623949	0.0640119
Podicipedidae.0	0.105263	wtt.pPC1	0.00318751	0.00610918	0.00929669
Polioptilidae.0	0.533333	wtt.pPC1	0.000405781	0.00215525	0.00256103
Prunellidae.0	0.0833333	wtt.pPC1	0.000996672	0.00667067	0.00766734
Psittacidae.1	0.673077	wtt.pPC1	0.00341164	0.00720468	0.0106163
Psittacidae.2	0.677019	wtt.pPC1	0.00158327	3.97e-08	0.00158331
Psittacidae.3	0.35	wtt.pPC1	0.00165516	0.0645977	0.0662529
Pteroclididae.0	0.125	wtt.pPC1	0.00233928	6.02e-11	0.00233928
Ptilonorhynchidae.0	0.684211	wtt.pPC1	0.00170669	0.0449172	0.0466239
Pycnonotidae.0	0.704	wtt.pPC1	0.00133241	5.36e-11	0.00133241
Rallidae.0	0.383459	wtt.pPC1	0.0032009	0.00478439	0.00798529
Ramphastidae.0	0.795082	wtt.pPC1	0.00109443	3.42e-11	0.00109443
Remizidae.0	0.384615	wtt.pPC1	0.00110437	2.97e-11	0.00110437
Rhinocryptidae.0	0.666667	wtt.pPC1	0.00249417	2.51e-10	0.00249417
Rhipiduridae.0	0.853659	wtt.pPC1	0.00122752	0.00287055	0.00409807
Scolopacidae.0	0.103448	wtt.pPC1	0.00149689	0.0285684	0.0300653
Sittidae.0	0.16	wtt.pPC1	0.000917558	0.0129397	0.0138572
Strigidae.0	0.554945	wtt.pPC1	0.00256168	5.66e-06	0.00256734
Sturnidae.0	0.66055	wtt.pPC1	0.00197213	3.81e-05	0.00201023
Sylviidae.1	0.267327	wtt.pPC1	0.0021941	0.00281604	0.00501014
Sylviidae.2	0.39375	wtt.pPC1	0.00225536	0.00589013	0.00814549
Sylviidae.3	0.722222	wtt.pPC1	0.00268867	3.36e-07	0.002689
Thamnophilidae.1	0.854922	wtt.pPC1	0.00126826	2.31e-07	0.0012685
Thamnophilidae.2	0.833333	wtt.pPC1	0.000904006	7.09e-10	0.000904007
Thraupidae.1	0.703704	wtt.pPC1	0.00088774	0.00814158	0.00902932
Thraupidae.2	0.790909	wtt.pPC1	0.00131594	1.54e-10	0.00131594
Thraupidae.3	0.798165	wtt.pPC1	0.00103192	2.65e-09	0.00103193
Threskiornithidae.0	0.205882	wtt.pPC1	0.00200216	0.00394934	0.0059515
Timaliidae.1	0.62069	wtt.pPC1	0.00188225	0.0423318	0.044214
Timaliidae.2	0.465909	wtt.pPC1	0.00121707	0.00292016	0.00413723
Timaliidae.3	0.36	wtt.pPC1	0.00178936	0.00175706	0.00354642
Timaliidae.4	0.05	wtt.pPC1	0.00157181	5.41e-09	0.00157182
Tinamidae.0	0.531915	wtt.pPC1	0.00481671	3.57e-09	0.00481672
Trochilidae.1	0.694268	wtt.pPC1	0.0033222	0.0149041	0.0182263
Trochilidae.2	0.908257	wtt.pPC1	0.00590559	0.000645971	0.00655156
Trochilidae.3	0.785714	wtt.pPC1	0.0125778	1.44e-10	0.0125778
Trochilidae.4	0.818182	wtt.pPC1	0.00301466	1.72e-10	0.00301466
Troglodytidae.0	0.772152	wtt.pPC1	0.00206278	3.54e-10	0.00206278
Trogonidae.0	0.72093	wtt.pPC1	0.00185752	0.00121825	0.00307577
Turdidae.0	0.514793	wtt.pPC1	0.00155565	0.00522046	0.00677611
Turnicidae.0	0.375	wtt.pPC1	0.0040273	0.0576759	0.0617032
Tyrannidae.1	0.585106	wtt.pPC1	0.0013487	0.00651172	0.00786042
Tyrannidae.2	0.42487	wtt.pPC1	0.0012684	0.0131651	0.0144335
Tyrannidae.3	0.777778	wtt.pPC1	0.00212204	0.00117545	0.00329749
Tyrannidae.4	0.818182	wtt.pPC1	0.00236407	2.11e-10	0.00236407
Tyrannidae.5	0.71875	wtt.pPC1	0.0075023	0.00630189	0.0138042
Tytonidae.0	0.533333	wtt.pPC1	0.00285161	9.24e-12	0.00285161
Vangidae.0	0.136364	wtt.pPC1	0.00142121	2.02e-09	0.00142121
Viduidae.0	0.631579	wtt.pPC1	0.00080665	5.16e-08	0.000806702
Vireonidae.0	0.576923	wtt.pPC1	0.00105226	1.21e-09	0.00105227
Zosteropidae.0	0.888889	wtt.pPC1	0.00146261	0.0307301	0.0321928
Acanthizidae.0	0.375	wtt.pPC2	0.000944857	0.00282717	0.00377203
Accipitridae.1	0.230769	wtt.pPC2	0.00297116	0.0176194	0.0205905
Accipitridae.2	0.321429	wtt.pPC2	0.00079793	0.000385498	0.00118343
Accipitridae.3	0.285714	wtt.pPC2	0.00108399	0.0025109	0.00359489
Aegithalidae.0	0.1	wtt.pPC2	0.000696229	0.00590688	0.00660311
Alaudidae.0	0.307692	wtt.pPC2	0.000824949	0.00154963	0.00237458
Alcedinidae.0	0.623656	wtt.pPC2	0.0015726	0.00110089	0.0026735
Anatidae.0	0.0649351	wtt.pPC2	0.00142294	0.0018747	0.00329764
Apodidae.0	0.627451	wtt.pPC2	0.00191159	1e-08	0.0019116
Ardeidae.0	0.112903	wtt.pPC2	0.000850826	8.47e-09	0.000850834
Artamidae.0	0.363636	wtt.pPC2	0.000386468	6.44e-09	0.000386474
Bucconidae.0	0.828571	wtt.pPC2	0.000835481	0.0016593	0.00249478
Bucerotidae.0	0.763636	wtt.pPC2	0.00103911	1.8e-10	0.00103911
Campephagidae.0	0.678571	wtt.pPC2	0.000517711	0.00121921	0.00173692
Caprimulgidae.0	0.511111	wtt.pPC2	0.00278647	0.0246827	0.0274692
Cardinalidae.0	0.5	wtt.pPC2	0.00042811	0.000885299	0.00131341
Certhiidae.0	0	wtt.pPC2	0.000406188	0.000864662	0.00127085
Charadriidae.0	0.109375	wtt.pPC2	0.000601292	0.00371153	0.00431282
Chloropseidae.0	0.636364	wtt.pPC2	0.00134152	0.00120635	0.00254787
Ciconiidae.0	0.157895	wtt.pPC2	0.00132875	0.00460006	0.0059288
Cisticolidae.0	0.587719	wtt.pPC2	0.00103059	4.46e-09	0.00103059
Colluricinclidae.0	0.785714	wtt.pPC2	0.000647201	0.00282858	0.00347578
Columbidae.1	0.767123	wtt.pPC2	0.00100071	3.57e-10	0.00100071
Columbidae.2	0.521739	wtt.pPC2	0.00104678	0.000185995	0.00123278
Columbidae.3	0.294118	wtt.pPC2	0.00127406	0.000333997	0.00160806
Coraciidae.0	0.416667	wtt.pPC2	0.000768826	0.00636938	0.00713821
Corvidae.0	0.418803	wtt.pPC2	0.000677684	5.47e-10	0.000677685
Cotingidae.0	0.75	wtt.pPC2	0.000772435	4.91e-09	0.00077244
Cracidae.0	0.76	wtt.pPC2	0.000593246	0.000375804	0.00096905
Cracticidae.0	0.545455	wtt.pPC2	0.000566863	4.01e-11	0.000566863
Cuculidae.0	0.475177	wtt.pPC2	0.000875273	0.00196847	0.00284374
Dendrocolaptidae.0	0.692308	wtt.pPC2	0.0006098	1.25e-08	0.000609813
Dicaeidae.0	0.8	wtt.pPC2	0.0014619	1.14e-10	0.0014619
Dicruridae.0	0.478261	wtt.pPC2	0.000917446	0.0120381	0.0129556
Emberizidae.1	0.370861	wtt.pPC2	0.000642703	5.03e-08	0.000642753
Emberizidae.2	0.47482	wtt.pPC2	0.00176541	0.00275945	0.00452486
Estrildidae.0	0.698529	wtt.pPC2	0.00150466	0.000854864	0.00235952
Eurylaimidae.0	0.8	wtt.pPC2	0.00190055	0.000769539	0.00267008
Falconidae.0	0.296875	wtt.pPC2	0.000608184	0.0068939	0.00750209
Formicariidae.0	0.888889	wtt.pPC2	0.00114793	0.00356195	0.00470987
Fringillidae.0	0.369697	wtt.pPC2	0.000630409	0.000172902	0.000803311
Furnariidae.2	0.755102	wtt.pPC2	0.000848764	0.00123239	0.00208115
Furnariidae.3	0.272727	wtt.pPC2	0.000798289	0.000799676	0.00159797
Galbulidae.0	0.888889	wtt.pPC2	0.00160781	5.94e-09	0.00160781
Glareolidae.0	0.333333	wtt.pPC2	0.000368281	4.34e-10	0.000368281
Gruidae.0	0.0666667	wtt.pPC2	0.000787411	1.06e-09	0.000787412
Haematopodidae.0	0	wtt.pPC2	0.000931562	0.00132527	0.00225683
Hirundinidae.0	0.365854	wtt.pPC2	0.00136319	0.00606174	0.00742493
Icteridae.0	0.515152	wtt.pPC2	0.000738736	0.000895126	0.00163386
Indicatoridae.0	0.625	wtt.pPC2	0.00106415	4.5e-11	0.00106415
Laniidae.0	0.4	wtt.pPC2	0.000437929	0.000854744	0.00129267
Malaconotidae.0	0.660377	wtt.pPC2	0.000526069	0.000128354	0.000654423
Maluridae.0	0.407407	wtt.pPC2	0.00101728	2.83e-11	0.00101728
Megapodiidae.0	0.904762	wtt.pPC2	0.00118362	0.0163967	0.0175803
Melanocharitidae.0	1	wtt.pPC2	0.000956964	8.62e-10	0.000956965
Meliphagidae.0	0.664773	wtt.pPC2	0.000602835	0.00137033	0.00197317
Meropidae.0	0.538462	wtt.pPC2	0.0019526	0.0206162	0.0225688
Mimidae.0	0.428571	wtt.pPC2	0.000477734	0.00085523	0.00133296
Momotidae.0	0.666667	wtt.pPC2	0.000627775	6.44e-10	0.000627776
Monarchidae.0	0.84375	wtt.pPC2	0.00187901	3.93e-10	0.00187901
Motacillidae.0	0.213115	wtt.pPC2	0.000488734	0.00210774	0.00259647
Muscicapidae.1	0.266667	wtt.pPC2	0.00081872	0.000589434	0.00140815
Muscicapidae.2	0.540984	wtt.pPC2	0.00100237	0.00476669	0.00576906
Muscicapidae.3	0.605263	wtt.pPC2	0.000796481	4.37e-11	0.000796481
Muscicapidae.4	0.8125	wtt.pPC2	0.000748538	7.57e-11	0.000748538
Musophagidae.0	0.826087	wtt.pPC2	0.000436984	3.06e-08	0.000437015
Nectariniidae.0	0.733871	wtt.pPC2	0.00320942	8.9e-10	0.00320942
Odontophoridae.0	0.677419	wtt.pPC2	0.00118205	1.69e-10	0.00118206
Oriolidae.0	0.7	wtt.pPC2	0.000651115	0.000153435	0.00080455
Otididae.0	0.24	wtt.pPC2	0.00101866	0.00254552	0.00356418
Pachycephalidae.0	0.864865	wtt.pPC2	0.000444343	0.000691188	0.00113553
Paradisaeidae.0	0.975	wtt.pPC2	0.00667467	2.45e-10	0.00667467
Paridae.0	0.215686	wtt.pPC2	0.000553478	0.0082046	0.00875808
Parulidae.0	0.368421	wtt.pPC2	0.000512615	0.000769599	0.00128221
Passeridae.0	0.469388	wtt.pPC2	0.000575622	0.00377056	0.00434618
Petroicidae.0	0.636364	wtt.pPC2	0.000507237	3.61e-07	0.000507598
Phalacrocoracidae.0	0.030303	wtt.pPC2	0.000860515	0.00801514	0.00887565
Phasianidae.0	0.376404	wtt.pPC2	0.00334762	0.00303763	0.00638525
Picidae.1	0.452632	wtt.pPC2	0.00153699	0.00119487	0.00273186
Picidae.2	0.814815	wtt.pPC2	0.0013813	0.00930412	0.0106854
Pipridae.0	0.851852	wtt.pPC2	0.00152303	0.00362286	0.00514589
Pittidae.0	0.65625	wtt.pPC2	0.00133547	0.000764299	0.00209977
Platysteiridae.0	0.741935	wtt.pPC2	0.00078803	1.28e-09	0.000788031
Ploceidae.0	0.707547	wtt.pPC2	0.00327568	0.00502016	0.00829584
Podargidae.0	0.8	wtt.pPC2	0.00109406	0.00536403	0.00645809
Podicipedidae.0	0.105263	wtt.pPC2	0.00196606	1.09e-09	0.00196607
Polioptilidae.0	0.533333	wtt.pPC2	0.00041761	6.33e-12	0.00041761
Prunellidae.0	0.0833333	wtt.pPC2	0.00051644	0.00637093	0.00688737
Psittacidae.1	0.673077	wtt.pPC2	0.00155096	0.0013991	0.00295006
Psittacidae.2	0.677019	wtt.pPC2	0.00130594	0.00229851	0.00360446
Psittacidae.3	0.35	wtt.pPC2	0.000738232	0.000198217	0.000936449
Pteroclididae.0	0.125	wtt.pPC2	0.000654202	3.15e-08	0.000654234
Ptilonorhynchidae.0	0.684211	wtt.pPC2	0.000865723	0.00431012	0.00517584
Pycnonotidae.0	0.704	wtt.pPC2	0.000527319	0.000651931	0.00117925
Rallidae.0	0.383459	wtt.pPC2	0.00175265	0.000514955	0.0022676
Ramphastidae.0	0.795082	wtt.pPC2	0.000785689	0.00181878	0.00260446
Remizidae.0	0.384615	wtt.pPC2	0.00113806	4.89e-10	0.00113806
Rhinocryptidae.0	0.666667	wtt.pPC2	0.00134333	0.000237075	0.00158041
Rhipiduridae.0	0.853659	wtt.pPC2	0.000604248	1.31e-07	0.000604379
Scolopacidae.0	0.103448	wtt.pPC2	0.00083759	0.00801807	0.00885566
Sittidae.0	0.16	wtt.pPC2	0.000551957	0.000322446	0.000874403
Strigidae.0	0.554945	wtt.pPC2	0.00206958	4.58e-09	0.00206958
Sturnidae.0	0.66055	wtt.pPC2	0.000940221	0.000758446	0.00169867
Sylviidae.1	0.267327	wtt.pPC2	0.000929542	0.00742358	0.00835312
Sylviidae.2	0.39375	wtt.pPC2	0.00119439	0.00563894	0.00683333
Sylviidae.3	0.722222	wtt.pPC2	0.000873061	1.35e-11	0.000873061
Thamnophilidae.1	0.854922	wtt.pPC2	0.0008237	0.000731806	0.00155551
Thamnophilidae.2	0.833333	wtt.pPC2	0.000741935	1.78e-09	0.000741937
Thraupidae.1	0.703704	wtt.pPC2	0.000504491	1.86e-08	0.00050451
Thraupidae.2	0.790909	wtt.pPC2	0.00068877	0.000218139	0.000906909
Thraupidae.3	0.798165	wtt.pPC2	0.000541688	0.000875522	0.00141721
Threskiornithidae.0	0.205882	wtt.pPC2	0.000890878	1.09e-09	0.000890879
Timaliidae.1	0.62069	wtt.pPC2	0.000758609	0.00214974	0.00290835
Timaliidae.2	0.465909	wtt.pPC2	0.000734693	0.00152036	0.00225505
Timaliidae.3	0.36	wtt.pPC2	0.000916322	0.0031459	0.00406223
Timaliidae.4	0.05	wtt.pPC2	0.000881939	4.48e-10	0.000881939
Tinamidae.0	0.531915	wtt.pPC2	0.00379826	0.0133337	0.017132
Trochilidae.1	0.694268	wtt.pPC2	0.00357287	0.0160057	0.0195786
Trochilidae.2	0.908257	wtt.pPC2	0.00453306	1.92e-05	0.00455226
Trochilidae.3	0.785714	wtt.pPC2	0.00693295	0.00103702	0.00796997
Trochilidae.4	0.818182	wtt.pPC2	0.00279611	0.000569953	0.00336606
Troglodytidae.0	0.772152	wtt.pPC2	0.00104578	3.47e-10	0.00104578
Trogonidae.0	0.72093	wtt.pPC2	0.00156707	0.00318891	0.00475597
Turdidae.0	0.514793	wtt.pPC2	0.000694313	1.27e-09	0.000694314
Turnicidae.0	0.375	wtt.pPC2	0.00253207	0.0149558	0.0174878
Tyrannidae.1	0.585106	wtt.pPC2	0.0006763	0.00419887	0.00487517
Tyrannidae.2	0.42487	wtt.pPC2	0.000605249	0.00396404	0.00456929
Tyrannidae.3	0.777778	wtt.pPC2	0.00100837	4.17e-09	0.00100837
Tyrannidae.4	0.818182	wtt.pPC2	0.00206351	0.000878355	0.00294186
Tyrannidae.5	0.71875	wtt.pPC2	0.0049454	3.12e-08	0.00494543
Tytonidae.0	0.533333	wtt.pPC2	0.00174135	0.00187509	0.00361645
Vangidae.0	0.136364	wtt.pPC2	0.00114346	0.00996224	0.0111057
Viduidae.0	0.631579	wtt.pPC2	0.000812496	0.000348444	0.00116094
Vireonidae.0	0.576923	wtt.pPC2	0.000676188	0.00154785	0.00222403
Zosteropidae.0	0.888889	wtt.pPC2	0.000967881	0.00454832	0.0055162
Acanthizidae.0	0.375	wtt.pPC3	0.000336369	3.87e-10	0.000336369
Accipitridae.1	0.230769	wtt.pPC3	0.000743402	1.18e-09	0.000743403
Accipitridae.2	0.321429	wtt.pPC3	0.00035688	2.47e-09	0.000356882
Accipitridae.3	0.285714	wtt.pPC3	0.00055829	0.00135343	0.00191172
Aegithalidae.0	0.1	wtt.pPC3	0.000766516	6.69e-05	0.000833416
Alaudidae.0	0.307692	wtt.pPC3	0.000404715	8.64e-11	0.000404715
Alcedinidae.0	0.623656	wtt.pPC3	0.000550539	0.000334195	0.000884734
Anatidae.0	0.0649351	wtt.pPC3	0.000406776	0.0022032	0.00260998
Apodidae.0	0.627451	wtt.pPC3	0.000903074	0.000606592	0.00150967
Ardeidae.0	0.112903	wtt.pPC3	0.000300022	0.00290597	0.00320599
Artamidae.0	0.363636	wtt.pPC3	0.000410517	1.78e-10	0.000410517
Bucconidae.0	0.828571	wtt.pPC3	0.00059369	2.06e-09	0.000593692
Bucerotidae.0	0.763636	wtt.pPC3	0.00111866	5.22e-10	0.00111866
Campephagidae.0	0.678571	wtt.pPC3	0.000268017	0.00105872	0.00132674
Caprimulgidae.0	0.511111	wtt.pPC3	0.00101037	0.00217957	0.00318994
Cardinalidae.0	0.5	wtt.pPC3	0.000420383	7.77e-11	0.000420383
Certhiidae.0	0	wtt.pPC3	0.000118461	0.00123129	0.00134975
Charadriidae.0	0.109375	wtt.pPC3	0.000287973	0.0012854	0.00157338
Chloropseidae.0	0.636364	wtt.pPC3	0.000751259	0.000875816	0.00162707
Ciconiidae.0	0.157895	wtt.pPC3	0.000300119	4.82e-09	0.000300124
Cisticolidae.0	0.587719	wtt.pPC3	0.000333971	2.05e-09	0.000333973
Colluricinclidae.0	0.785714	wtt.pPC3	0.000370935	2.45e-09	0.000370937
Columbidae.1	0.767123	wtt.pPC3	0.00048202	2.53e-10	0.00048202
Columbidae.2	0.521739	wtt.pPC3	0.000417927	0.000185267	0.000603194
Columbidae.3	0.294118	wtt.pPC3	0.000304424	0.0102818	0.0105863
Coraciidae.0	0.416667	wtt.pPC3	0.000613036	0.00173658	0.00234962
Corvidae.0	0.418803	wtt.pPC3	0.000322143	4.66e-05	0.000368743
Cotingidae.0	0.75	wtt.pPC3	0.000567968	8.91e-10	0.000567969
Cracidae.0	0.76	wtt.pPC3	0.000546752	1.27e-11	0.000546752
Cracticidae.0	0.545455	wtt.pPC3	0.00034214	0.000453197	0.000795337
Cuculidae.0	0.475177	wtt.pPC3	0.000490184	0.000848901	0.00133909
Dendrocolaptidae.0	0.692308	wtt.pPC3	0.000273243	0.000347558	0.000620801
Dicaeidae.0	0.8	wtt.pPC3	0.000448167	3.45e-10	0.000448167
Dicruridae.0	0.478261	wtt.pPC3	0.000340376	0.00450646	0.00484684
Emberizidae.1	0.370861	wtt.pPC3	0.000405345	0.000576237	0.000981582
Emberizidae.2	0.47482	wtt.pPC3	0.0010112	1.87e-08	0.00101122
Estrildidae.0	0.698529	wtt.pPC3	0.000598615	0.000715418	0.00131403
Eurylaimidae.0	0.8	wtt.pPC3	0.000976136	0.00503724	0.00601338
Falconidae.0	0.296875	wtt.pPC3	0.000381546	0.000102202	0.000483748
Formicariidae.0	0.888889	wtt.pPC3	0.000484198	0.00281141	0.00329561
Fringillidae.0	0.369697	wtt.pPC3	0.00062913	0.00140853	0.00203766
Furnariidae.2	0.755102	wtt.pPC3	0.000549149	7.33e-10	0.00054915
Furnariidae.3	0.272727	wtt.pPC3	0.000289886	1.37e-07	0.000290023
Galbulidae.0	0.888889	wtt.pPC3	0.00081336	0.00437938	0.00519274
Glareolidae.0	0.333333	wtt.pPC3	0.00027621	3.49e-09	0.000276213
Gruidae.0	0.0666667	wtt.pPC3	0.000387795	0.000690929	0.00107872
Haematopodidae.0	0	wtt.pPC3	0.000303886	0.000879175	0.00118306
Hirundinidae.0	0.365854	wtt.pPC3	0.0004967	0.00130743	0.00180413
Icteridae.0	0.515152	wtt.pPC3	0.000441279	0.00102066	0.00146194
Indicatoridae.0	0.625	wtt.pPC3	0.000434126	0.00506209	0.00549621
Laniidae.0	0.4	wtt.pPC3	0.000192041	1.37e-09	0.000192042
Malaconotidae.0	0.660377	wtt.pPC3	0.000330277	8.84e-10	0.000330278
Maluridae.0	0.407407	wtt.pPC3	0.000375283	0.00122538	0.00160066
Megapodiidae.0	0.904762	wtt.pPC3	0.00051206	0.000459219	0.000971279
Melanocharitidae.0	1	wtt.pPC3	0.000562364	0.00236992	0.00293229
Meliphagidae.0	0.664773	wtt.pPC3	0.000395075	0.00148672	0.0018818
Meropidae.0	0.538462	wtt.pPC3	0.000815428	8.67e-08	0.000815515
Mimidae.0	0.428571	wtt.pPC3	0.000282226	3.28e-10	0.000282226
Momotidae.0	0.666667	wtt.pPC3	0.000331733	3.8e-10	0.000331733
Monarchidae.0	0.84375	wtt.pPC3	0.000698364	0.0041261	0.00482447
Motacillidae.0	0.213115	wtt.pPC3	0.000272188	0.000251541	0.000523729
Muscicapidae.1	0.266667	wtt.pPC3	0.000455876	0.000110766	0.000566642
Muscicapidae.2	0.540984	wtt.pPC3	0.000473724	0.000999673	0.0014734
Muscicapidae.3	0.605263	wtt.pPC3	0.000488478	0.00170329	0.00219177
Muscicapidae.4	0.8125	wtt.pPC3	0.000371695	1.51e-10	0.000371695
Musophagidae.0	0.826087	wtt.pPC3	0.000230069	0.00066205	0.000892119
Nectariniidae.0	0.733871	wtt.pPC3	0.000483097	1.06e-09	0.000483098
Odontophoridae.0	0.677419	wtt.pPC3	0.000462423	0.000437781	0.000900204
Oriolidae.0	0.7	wtt.pPC3	0.00043564	0.00275413	0.00318977
Otididae.0	0.24	wtt.pPC3	0.000533576	2.18e-12	0.000533576
Pachycephalidae.0	0.864865	wtt.pPC3	0.000262372	0.0026171	0.00287948
Paradisaeidae.0	0.975	wtt.pPC3	0.00134972	4.42e-05	0.00139392
Paridae.0	0.215686	wtt.pPC3	0.000307604	0.008225	0.0085326
Parulidae.0	0.368421	wtt.pPC3	0.00033341	0.000216589	0.000549999
Passeridae.0	0.469388	wtt.pPC3	0.00029825	4.24e-10	0.00029825
Petroicidae.0	0.636364	wtt.pPC3	0.000411317	3.48e-09	0.00041132
Phalacrocoracidae.0	0.030303	wtt.pPC3	0.00024038	0.00192908	0.00216946
Phasianidae.0	0.376404	wtt.pPC3	0.000611867	0.000494939	0.00110681
Picidae.1	0.452632	wtt.pPC3	0.000782317	0.000925759	0.00170808
Picidae.2	0.814815	wtt.pPC3	0.00071317	4.64e-10	0.00071317
Pipridae.0	0.851852	wtt.pPC3	0.000553649	8.79e-12	0.000553649
Pittidae.0	0.65625	wtt.pPC3	0.000516439	5.42e-10	0.00051644
Platysteiridae.0	0.741935	wtt.pPC3	0.000488876	3.97e-06	0.000492846
Ploceidae.0	0.707547	wtt.pPC3	0.000476912	0.000731651	0.00120856
Podargidae.0	0.8	wtt.pPC3	0.000602404	1.84e-08	0.000602422
Podicipedidae.0	0.105263	wtt.pPC3	0.000396307	2.24e-09	0.000396309
Polioptilidae.0	0.533333	wtt.pPC3	0.000331855	0.0018146	0.00214645
Prunellidae.0	0.0833333	wtt.pPC3	0.000157547	0.00528728	0.00544482
Psittacidae.1	0.673077	wtt.pPC3	0.000521298	0.000169501	0.000690799
Psittacidae.2	0.677019	wtt.pPC3	0.000726234	0.00102408	0.00175031
Psittacidae.3	0.35	wtt.pPC3	0.000325444	0.00256025	0.00288569
Pteroclididae.0	0.125	wtt.pPC3	0.000255479	0.00478376	0.00503924
Ptilonorhynchidae.0	0.684211	wtt.pPC3	0.000201254	3.47e-08	0.000201289
Pycnonotidae.0	0.704	wtt.pPC3	0.000387465	4.06e-10	0.000387465
Rallidae.0	0.383459	wtt.pPC3	0.00088225	0.00235019	0.00323244
Ramphastidae.0	0.795082	wtt.pPC3	0.000362432	9.88e-05	0.000461232
Remizidae.0	0.384615	wtt.pPC3	0.000275033	0.000501666	0.000776699
Rhinocryptidae.0	0.666667	wtt.pPC3	0.000573426	0.000428738	0.00100216
Rhipiduridae.0	0.853659	wtt.pPC3	0.00041058	0.00256014	0.00297072
Scolopacidae.0	0.103448	wtt.pPC3	0.000323344	1.84e-05	0.000341744
Sittidae.0	0.16	wtt.pPC3	0.000234218	9.23e-10	0.000234219
Strigidae.0	0.554945	wtt.pPC3	0.000970182	0.00126928	0.00223947
Sturnidae.0	0.66055	wtt.pPC3	0.000239735	1.35e-10	0.000239735
Sylviidae.1	0.267327	wtt.pPC3	0.000504742	0.000121166	0.000625908
Sylviidae.2	0.39375	wtt.pPC3	0.000477845	0.00136806	0.00184591
Sylviidae.3	0.722222	wtt.pPC3	0.000405665	1.84e-10	0.000405665
Thamnophilidae.1	0.854922	wtt.pPC3	0.000471716	2.15e-05	0.000493216
Thamnophilidae.2	0.833333	wtt.pPC3	0.000540888	1.62e-12	0.000540888
Thraupidae.1	0.703704	wtt.pPC3	0.000315442	0.00181226	0.00212771
Thraupidae.2	0.790909	wtt.pPC3	0.000413011	0.000180584	0.000593595
Thraupidae.3	0.798165	wtt.pPC3	0.000381877	6.68e-10	0.000381878
Threskiornithidae.0	0.205882	wtt.pPC3	0.000258897	6.92e-10	0.000258898
Timaliidae.1	0.62069	wtt.pPC3	0.000400015	2.26e-11	0.000400015
Timaliidae.2	0.465909	wtt.pPC3	0.000332624	0.000444599	0.000777223
Timaliidae.3	0.36	wtt.pPC3	0.000464595	4.03e-09	0.000464599
Timaliidae.4	0.05	wtt.pPC3	0.0002596	2.02e-10	0.0002596
Tinamidae.0	0.531915	wtt.pPC3	0.000549927	1.64e-08	0.000549943
Trochilidae.1	0.694268	wtt.pPC3	0.00140677	0.0024708	0.00387756
Trochilidae.2	0.908257	wtt.pPC3	0.00127413	0.00204573	0.00331986
Trochilidae.3	0.785714	wtt.pPC3	0.00137065	8.85e-11	0.00137065
Trochilidae.4	0.818182	wtt.pPC3	0.00157163	9.83e-09	0.00157164
Troglodytidae.0	0.772152	wtt.pPC3	0.000391964	0.000504668	0.000896632
Trogonidae.0	0.72093	wtt.pPC3	0.000578901	0.00136457	0.00194347
Turdidae.0	0.514793	wtt.pPC3	0.000353407	0.000217274	0.000570681
Turnicidae.0	0.375	wtt.pPC3	0.000577721	0.00103823	0.00161595
Tyrannidae.1	0.585106	wtt.pPC3	0.000415066	8.7e-10	0.000415067
Tyrannidae.2	0.42487	wtt.pPC3	0.000331762	0.00156441	0.00189617
Tyrannidae.3	0.777778	wtt.pPC3	0.000664134	2.99e-11	0.000664134
Tyrannidae.4	0.818182	wtt.pPC3	0.00108203	3.8e-11	0.00108203
Tyrannidae.5	0.71875	wtt.pPC3	0.000831056	9.71e-05	0.000928156
Tytonidae.0	0.533333	wtt.pPC3	0.000697734	4.66e-10	0.000697734
Vangidae.0	0.136364	wtt.pPC3	0.000574513	0.00190571	0.00248023
Viduidae.0	0.631579	wtt.pPC3	0.000152813	0.00028922	0.000442033
Vireonidae.0	0.576923	wtt.pPC3	0.000495841	2.22e-10	0.000495841
Zosteropidae.0	0.888889	wtt.pPC3	0.000483658	0.000633893	0.00111755

## Sheet: notes
family.id	clade ID
proptrop.breeding	proportion of taxa in clade with exclusively tropical breeding ranges
trait	trait ID
mean.se.sq	mean squared standard error for specified clade*trait combination
mean.BM1.error	mean estimated nuisance error from BM1 models
total.error	=mean.se.sq+mean.BM1.error
